# Supplementary material for: Herbal medicine use in pregnancy: results of a multinational study
Source: PubMed Central journal article supplement (PMC4029224; doi:10.1186/1472-6882-13-355), 2013-12-12
Supplement: 1472-6882-13-355-S2.pdf [file 1472-6882-13-355-S2.pdf]

**Additional file 2:** Socio-demographic characteristics of the study population and general birthing population on individual country

**Table 2a:** Socio-demographic characteristics in Western European countries (United Kingdom (UK), Italy and Switzerland)

|                                                         | Study sample<br>in the UK<br>n=1,120<br>(%) | General<br>birthing<br>population in<br>UK*<br>LB=723,165 [1]<br>(%) | Study sample<br>in Italy<br>n=926<br>(%) | General<br>birthing<br>population in<br>Italy<br>LB=546,606 [2]<br>(%) | Study sample<br>in<br>Switzerland<br>n=618<br>(%) | General birthing<br>population in<br>Switzerland<br>LB=80,808 [2]<br>(%) |
|---------------------------------------------------------|---------------------------------------------|----------------------------------------------------------------------|------------------------------------------|------------------------------------------------------------------------|---------------------------------------------------|--------------------------------------------------------------------------|
| <b>Mean Age +/- sd</b>                                  | 30.5 +/- 5.2                                | 29.6 [1]                                                             | 32.3 +/- 5.0                             | 31.3 [3]                                                               | 31.6 +/- 4.3                                      | 31.4 [4]                                                                 |
| <b>Marital status</b>                                   |                                             |                                                                      |                                          |                                                                        |                                                   |                                                                          |
| In marriage                                             | 63.3                                        | 53.2 [1]                                                             | 68.8                                     | 75.1 [2]                                                               | 80.0                                              | 80.7 [4]                                                                 |
| Outside marriage                                        | 36.7                                        | 46.8 [1]                                                             | 31.2                                     | 31.5 [2]                                                               | 20.0                                              | 19.3 [4]                                                                 |
| <b>Parity</b>                                           |                                             |                                                                      |                                          |                                                                        |                                                   |                                                                          |
| No previous children                                    | 48.0 <sup>†</sup>                           | 41.9 [1] <sup>†</sup>                                                | 59.7                                     | 48.7 [5]                                                               | 53.2                                              | -                                                                        |
| <b>Educational level</b>                                |                                             |                                                                      |                                          |                                                                        |                                                   |                                                                          |
| Less than high school                                   | 0.6                                         | 16.5 [1]                                                             | 7.0                                      | 25.2 [6]                                                               | 11.0                                              | 11.7 [6]                                                                 |
| High school                                             | 27.9                                        | 37.2 [1]                                                             | 47.2                                     | 49.2 [6]                                                               | 13.6                                              | 49.2 [6]                                                                 |
| More than high school                                   | 52.1                                        | 46.3 [1]                                                             | 44.3                                     | 25.6 [6]                                                               | 47.2                                              | 39.1 [6]                                                                 |
| Other                                                   | 19.3                                        | -                                                                    | 1.5                                      | -                                                                      | 28.2                                              | -                                                                        |
| <b>Women smoking before pregnancy</b>                   | 25.2                                        | 25.7 [7]                                                             | 34.2                                     | 33.3 [3]                                                               | 25.1                                              | 25.4 [7]                                                                 |
| <b>Women smoking during pregnancy</b>                   | 7.1 <sup>‡</sup>                            | 13.2 [8] <sup>‡</sup>                                                | 10.5                                     | 22.7 [9]                                                               | 5.5                                               | 6.6 [10]                                                                 |
| <b>Use of alcohol during pregnancy</b>                  | 28.3                                        | 24.0 [11] <sup>§</sup>                                               | 17.9                                     | 17.7 [9]                                                               | 20.7                                              | 29.9 [10]                                                                |
| <b>No. of respondents/No. live births</b> <sup>**</sup> | 0.9%                                        |                                                                      | 1.0%                                     |                                                                        | 4.6%                                              |                                                                          |

Abbreviations: LB: Number of live births per year.

\*The figures shown here are statistic estimates for England and Wales. Scotland and Northern Ireland have separate statistical reports. Since more than 85% of the study population in UK were resident in England and about 8% in Wales, we are only showing national statistic data for these two parts of the UK.

<sup>†</sup>Among married women only – as provided by the Statistics Bureau in the UK.

‡Among women resident in England only (as provided by the Statistics Bureau in the UK, data on 4<sup>th</sup> Quarter of 2011).

§Women reporting at least one occasion during pregnancy of consuming more than four drinks in a day.

\*\*The ratio “No. of respondents/No. live births” is calculated as the proportion (%) of pregnancies included in the study among live births in the country in two months (period of data collection).

**Table 2b:** Socio-demographic characteristics in Western European countries (France, The Netherlands and Austria)

|                                             | <b>Study sample<br/>in France<br/>n=374</b> | <b>General birthing<br/>population in<br/>France<br/>LB=824,263 [2]</b> | <b>Study<br/>sample in<br/>Netherlands<br/>n=81</b> | <b>General birthing<br/>population in<br/>Netherlands<br/>LB=180,060 [2]</b> | <b>Study<br/>sample in<br/>Austria<br/>n=82</b> | <b>General<br/>birthing<br/>population in<br/>Austria<br/>LB=78,109 [2]</b> |
|---------------------------------------------|---------------------------------------------|-------------------------------------------------------------------------|-----------------------------------------------------|------------------------------------------------------------------------------|-------------------------------------------------|-----------------------------------------------------------------------------|
|                                             | (%)                                         | (%)                                                                     | (%)                                                 | (%)                                                                          | (%)                                             | (%)                                                                         |
| <b>Mean Age +/- sd</b>                      | 29.6 +/- 4.9                                | 30.1 [12]                                                               | 32.0 +/- 6.4                                        | 31.0 [13]                                                                    | 30.6 +/- 4.6                                    | 30.0 [14]                                                                   |
| <b>Marital status</b>                       |                                             |                                                                         |                                                     |                                                                              |                                                 |                                                                             |
| In marriage                                 | 48.9                                        | 45.0 [2]                                                                | 69.1                                                | 58.2 [13]                                                                    | 48.8                                            | 59.6 [15]                                                                   |
| Outside marriage                            | 51.1                                        | 55.0 [2]                                                                | 30.8                                                | 41.8 [13]                                                                    | 51.2                                            | 40.4 [15]                                                                   |
| <b>Parity</b>                               |                                             |                                                                         |                                                     |                                                                              |                                                 |                                                                             |
| No previous children                        | 52.9                                        | 44.2[16]                                                                | 38.3                                                | 46.4 [13]                                                                    | 63.4                                            | 47.9 [15]                                                                   |
| <b>Educational level</b>                    |                                             |                                                                         |                                                     |                                                                              |                                                 |                                                                             |
| Less than high school                       | 1.6                                         | 15.4 [6]                                                                | 9.9                                                 | 15.9 [6]                                                                     | 9.8                                             | 13.3 [6]                                                                    |
| High-school                                 | 25.1                                        | 37.4 [6]                                                                | 66.7                                                | 40.2 [6]                                                                     | 32.9                                            | 64.1 [6]                                                                    |
| More than high school                       | 57.0                                        | 47.2 [6]                                                                | 23.5                                                | 43.9 [6]                                                                     | 40.2                                            | 22.7 [6]                                                                    |
| Other                                       | 16.3                                        | -                                                                       | -                                                   | -                                                                            | 17.1                                            | -                                                                           |
| <b>Women smoking before pregnancy</b>       | 39.3                                        | 39.0 [16]                                                               | 34.6                                                | 29.5 [7]                                                                     | 31.7                                            | 32.1 [17]                                                                   |
| <b>Women smoking during pregnancy</b>       | 14.2                                        | 28.0 [16]                                                               | 14.8                                                | 17.1 [18]                                                                    | 4.9                                             | -                                                                           |
| <b>Use of alcohol during pregnancy</b>      | 11.5                                        | 52.0 [19]                                                               | 11.1                                                | 16-35 [13]                                                                   | 13.4                                            | -                                                                           |
| <b>No. of respondents/No. live births *</b> | 0.3%                                        |                                                                         | 0.3%                                                |                                                                              | 0.6%                                            |                                                                             |

Abbreviations: LB: Number of live births per year.

\*The ratio “No. of respondents/No. live births” is calculated as the proportion (%) of pregnancies included in the study among live births in the country in two months (period of data collection).

**Table 2c:** Socio-demographic characteristics in Northern European countries (Norway, Sweden and Finland)

|                                             | Study sample<br>in Norway<br>n=1,228<br>(%) | General<br>birthing<br>population in<br>Norway<br>LB=60,220 [2]<br>(%) | Study sample<br>in Sweden<br>n=887<br>(%) | General<br>birthing<br>population in<br>Sweden<br>LB=111,770 [2]<br>(%) | Study sample<br>in Finland<br>n=574<br>(%) | General<br>birthing<br>population in<br>Finland<br>LB=59,961 [2]<br>(%) |
|---------------------------------------------|---------------------------------------------|------------------------------------------------------------------------|-------------------------------------------|-------------------------------------------------------------------------|--------------------------------------------|-------------------------------------------------------------------------|
| <i>Mean Age +/- sd</i>                      | 29.0 +/- 4.6                                | 29.8 +/- 5.3 [20]                                                      | 29.8 +/- 5.3                              | 30.3 [21]                                                               | 29.0 +/- 5.1                               | 30.1 [22]                                                               |
| <i>Marital status</i>                       |                                             |                                                                        |                                           |                                                                         |                                            |                                                                         |
| In marriage                                 | 39.1                                        | 46.0 [20]                                                              | 40.7                                      | 45.8 [2]                                                                | 59.4                                       | 57.8 [22]                                                               |
| Outside marriage                            | 60.9                                        | 53.4 [20]                                                              | 59.3                                      | 54.2 [2]                                                                | 40.6                                       | 42.0 [22]                                                               |
| Unknown                                     | -                                           | 0.6 [20]                                                               |                                           |                                                                         | -                                          | 0.2 [22]                                                                |
| <i>Parity</i>                               |                                             |                                                                        |                                           |                                                                         |                                            |                                                                         |
| No previous children                        | 41.4                                        | 42.4 [20]                                                              | 63.1                                      | 44.9 [21]                                                               | 35.5                                       | 42.2 [22]                                                               |
| <i>Educational level</i>                    |                                             |                                                                        |                                           |                                                                         |                                            |                                                                         |
| Less than high school                       | 4.5                                         | 14.7 [6]                                                               | 5.2                                       | 11.1 [6]                                                                | 8.2                                        | 7.1 [6]                                                                 |
| High-school                                 | 28.0                                        | 31.4 [6]                                                               | 30.0                                      | 38.2 [6]                                                                | 36.4                                       | 44.5 [6]                                                                |
| More than high school                       | 46.9                                        | 53.9 [6]                                                               | 60.6                                      | 50.6 [6]                                                                | 52.6                                       | 48.4 [6]                                                                |
| Other                                       | 20.7                                        | -                                                                      | 4.2                                       | -                                                                       | 2.8                                        | -                                                                       |
| <i>Women smoking before pregnancy</i>       | 33.5                                        | 36.5 [7]                                                               | 25.0                                      | 27.2 [7]                                                                | 36.7                                       | 19.7 [7]                                                                |
| <i>Women smoking during pregnancy</i>       | 6.8                                         | 7.0 [20]                                                               | 5.4                                       | 6.5 [21]                                                                | 11.7                                       | 15.2 [22]                                                               |
| <i>Use of alcohol during pregnancy</i>      | 4.1                                         | 7.4 [23]                                                               | 7.2                                       | 5.9 [24]                                                                | 13.9                                       | -                                                                       |
| <i>No. of respondents/No. live births</i> * | 12.2%                                       |                                                                        | 4.8%                                      |                                                                         | 5.7%                                       |                                                                         |

Abbreviations: LB: Number of live births per year.

\*The ratio “No. of respondents/No. live births” is calculated as the proportion (%) of pregnancies included in the study among live births in the country in two months (period of data collection).

**Table 2d:** Socio-demographic characteristics in Northern European countries (Iceland)

|                                             | Study sample in<br>Iceland<br>n=70<br>(%) | General birthing<br>population in Iceland<br>LB=4,492 [2]<br>(%) |
|---------------------------------------------|-------------------------------------------|------------------------------------------------------------------|
| <i>Age range (years)</i>                    |                                           |                                                                  |
| 15-20                                       | 11.3                                      | 5.1 [25]                                                         |
| 21-25                                       | 16.9                                      | 19.3 [25]                                                        |
| 26-30                                       | 42.3                                      | 34.2 [25]                                                        |
| 31-35                                       | 15.5                                      | 27.3 [25]                                                        |
| 36-40                                       | 12.7                                      | 11.7 [25]                                                        |
| ≥41                                         | 1.4                                       | 2.4 [25]                                                         |
| <i>Marital status</i>                       |                                           |                                                                  |
| In marriage                                 | 31.0                                      | 35.0 [25]                                                        |
| Outside marriage                            | 69.0                                      | 65.0 [25]                                                        |
| <i>Parity</i>                               |                                           |                                                                  |
| No previous children                        | 47.9                                      | 38.1 [25]                                                        |
| <i>Educational level</i>                    |                                           |                                                                  |
| Less than high school                       | 25.4                                      | 21.4 [6]                                                         |
| High-school                                 | 18.3                                      | 30.5 [6]                                                         |
| More than high school                       | 43.7                                      | 48.1 [6]                                                         |
| Other                                       | 12.7                                      | -                                                                |
| <i>Women smoking before pregnancy</i>       | 40.8                                      | 35.5 [7]                                                         |
| <i>No. of respondents/No. live births</i> * | 9.3%                                      |                                                                  |

Abbreviations: LB: Number of live births per year.

\*The ratio “No. of respondents/No. live births” is calculated as the proportion (%) of pregnancies included in the study among live births in the country in two months (period of data collection).

**Table 2e:** Socio-demographic characteristics in Eastern European countries (Russia and Poland)

|                                             | <b>Study sample<br/>in Russia<br/>n=1,008<br/>(%)</b> | <b>General birthing<br/>population in Russia<br/>LB=1,796,629 [2]<br/>(%)</b> | <b>Study sample<br/>in Poland<br/>n=679<br/>(%)</b> | <b>General birthing<br/>population in Poland<br/>LB=388,416 [2]<br/>(%)</b> |
|---------------------------------------------|-------------------------------------------------------|-------------------------------------------------------------------------------|-----------------------------------------------------|-----------------------------------------------------------------------------|
| <i>Mean Age +/- sd</i>                      | 27.7 +/- 4.8                                          | 27.4 [26]                                                                     | 27.1 +/- 4.1                                        | 28.6 [27] *                                                                 |
| <i>Marital status</i>                       |                                                       |                                                                               |                                                     |                                                                             |
| In marriage                                 | 85.3                                                  | 73.9 [26]                                                                     | 85.0                                                | 79.4 [27]                                                                   |
| Outside marriage                            | 14.7                                                  | 26.1 [26]                                                                     | 15.0                                                | 20.6 [27]                                                                   |
| <i>Parity</i>                               |                                                       |                                                                               |                                                     |                                                                             |
| No previous children                        | 57.9                                                  | -                                                                             | 40.6                                                | 50.1 [27]                                                                   |
| <i>Educational level</i>                    |                                                       |                                                                               |                                                     |                                                                             |
| Less than high school                       | 1.6                                                   | -                                                                             | 1.9                                                 | 8.7 [27]                                                                    |
| High-school                                 | 9.3                                                   | -                                                                             | 31.1                                                | 49.6 [27]                                                                   |
| More than high school                       | 75.1                                                  | -                                                                             | 65.1                                                | 41.6 [27]                                                                   |
| Other                                       | 14.0                                                  | -                                                                             | 1.9                                                 | -                                                                           |
| <i>Women smoking before pregnancy</i>       | 46.1                                                  | 30.8 [28]                                                                     | 49.2                                                | 25.0 [29]                                                                   |
| <i>Women smoking during pregnancy</i>       | 9.6                                                   | 4.3-6.5 [30, 31]                                                              | 12.8                                                | 22-30 [29]                                                                  |
| <i>Use of alcohol during pregnancy</i>      | 26.0                                                  | 60.0 [32]                                                                     | 9.6                                                 | 15.3 [33]                                                                   |
| <i>No. of respondents/No. live births</i> † | 0.3%                                                  |                                                                               | 1.0%                                                |                                                                             |

Abbreviations: LB: Number of live births per year.

\*Median age of women at birth, not mean age.

†The ratio “No. of respondents/No. live births” is calculated as the proportion (%) of pregnancies included in the study among live births in the country in two months (period of data collection).

**Table 2f:** Socio-demographic characteristics in Eastern European countries (Croatia, Serbia and Slovenia)

|                                             | Study sample in Croatia<br>n=286 | General birthing population in Croatia<br>LB=41,197 [2] | Study sample in Serbia<br>n=220 | General birthing population in Serbia<br>LB=65,598 [2] | Study sample in Slovenia<br>n=149 | General birthing population in Slovenia<br>LB=21,947 [2] |
|---------------------------------------------|----------------------------------|---------------------------------------------------------|---------------------------------|--------------------------------------------------------|-----------------------------------|----------------------------------------------------------|
|                                             | n (%)                            | (%)                                                     | n (%)                           | (%)                                                    | n (%)                             | (%)                                                      |
| <i>Mean Age +/- sd</i>                      | 29.1 +/- 4.5*                    | 27.7 [34]                                               | 29.2 +/- 3.9*                   | 28.7 [35]                                              | 31.7 +/- 4.5                      | 30.4 [36]                                                |
| <i>Marital status</i>                       |                                  |                                                         |                                 |                                                        |                                   |                                                          |
| In marriage                                 | 83.9                             | 86.7 [34]                                               | 90.1                            | 76.1 [35]                                              | 47.0                              | 43.2 [36]                                                |
| Outside marriage                            | 16.1                             | 13.3 [34]                                               | 9.9                             | 23.9 [35]                                              | 53.0                              | 56.8 [36]                                                |
| Unknown                                     | -                                | -                                                       | -                               | -                                                      | -                                 | -                                                        |
| <i>Parity</i>                               |                                  |                                                         |                                 |                                                        |                                   |                                                          |
| No previous children                        | 50.7                             | 46.9 [34]                                               | 46.8                            | 51.1 [35]                                              | 45.6                              | 48.5 [36]                                                |
| <i>Educational level</i>                    |                                  |                                                         |                                 |                                                        |                                   |                                                          |
| Less than high school                       | 1.0                              | 3.1 [34]                                                | 0.9                             | 15.9 [37]                                              | 2.0                               | 8.5 [36]                                                 |
| High-school                                 | 36.7                             | 52.5 [34]                                               | 33.6                            | 54.9 [37]                                              | 24.8                              | 48.5 [36]                                                |
| More than high school                       | 61.2                             | 44.4 [34]                                               | 61.8                            | 29.2 [37]                                              | 69.1                              | 43.0 [36]                                                |
| Other                                       | 1.0                              | -                                                       | 3.6                             | -                                                      | 4.0                               | -                                                        |
| <i>Women smoking before pregnancy</i>       | 50.0                             | 34.4 [34]                                               | 49.1                            | 29.9 [38]                                              | 32.9                              | 34.4 [7]                                                 |
| <i>Women smoking during pregnancy</i>       | 18.8                             | 23.1 [39]                                               | 18.2                            | 18.4 [40]                                              | 6.7                               | 9.6-11.2 [41]                                            |
| <i>Use of alcohol during pregnancy</i>      | 12.6                             | 15.5 [42]                                               | 15.0                            | -                                                      | 32.2                              | -                                                        |
| <i>No. of respondents/No. live births</i> † | 4.2%                             |                                                         | 2.0%                            |                                                        | 4.1%                              |                                                          |

Abbreviations: LB: Number of live births per year.

\*Mean age for first child (as it is available from the Statistics Bureau reports in Croatia and Serbia).

†The ratio “No. of respondents/No. live births” is calculated as the proportion (%) of pregnancies included in the study among live births in the country in two months (period of data collection).

**Table 2g:** Socio-demographic characteristics in North American countries (USA, Canada) and Australia.

|                          | Study sample in<br>The USA<br>n=297 | General<br>birthing<br>population in<br>USA<br>LB=3,999,386<br>[43] | Study<br>sample in<br>Canada<br>n=236 | General<br>birthing<br>population in<br>Canada<br>LB=377,636<br>[44] | Study<br>sample in<br>Australia<br>n=217 | General<br>birthing<br>population in<br>Australia<br>LB=301,617<br>[45] |
|--------------------------|-------------------------------------|---------------------------------------------------------------------|---------------------------------------|----------------------------------------------------------------------|------------------------------------------|-------------------------------------------------------------------------|
|                          | n (%)                               | (%)                                                                 | n (%)                                 | (%)                                                                  | n (%)                                    | (%)                                                                     |
| <i>Age range (years)</i> |                                     |                                                                     |                                       |                                                                      |                                          |                                                                         |
| 15-19                    | 4.7                                 | 9.3 [43]                                                            | 2.1                                   | 3.9 [44]                                                             | 2.3                                      | 3.8 [45]                                                                |
| 20-24                    | 18.2                                | 23.8 [43]                                                           | 25.0                                  | 14.6 [44]                                                            | 8.8                                      | 13.8 [45]                                                               |
| 25-29                    | 28.3                                | 28.3 [43]                                                           | 30.1                                  | 30.2 [44]                                                            | 31.8                                     | 27.9 [45]                                                               |
| 30-34                    | 29.3                                | 24.1 [43]                                                           | 30.5                                  | 32.2 [44]                                                            | 27.6                                     | 31.7 [45]                                                               |
| 35-39                    | 15.2                                | 11.6 [43]                                                           | 11.0                                  | 15.6 [44]                                                            | 22.1                                     | 18.4 [45]                                                               |
| 40-44                    | 4.0                                 | 2.7 [43]                                                            | 1.3                                   | 3.1 [44]                                                             | 6.9                                      | 4.0 [45]                                                                |
| ≥45                      | 0.3                                 | 0.2 [43]                                                            | -                                     | 0.2 [44]                                                             | 0.5                                      | 0.2 [45]                                                                |
| <i>Mean Age +/- sd</i>   | 29.3 +/- 6.1                        | -                                                                   | 28.3 +/- 5.2                          | 29.6 [44]                                                            | 31.1 +/- 5.7                             | 30.7 [45]                                                               |
| <i>Marital status</i>    |                                     |                                                                     |                                       |                                                                      |                                          |                                                                         |
| In marriage              | 67.0                                | 59.2 [46]                                                           | 42.4                                  | 60.4 [44]                                                            | 70.5                                     | 65.8 [45]                                                               |
| Outside marriage         | 33.0                                | 39.9 [46]                                                           | 57.6                                  | 28.8 [44]                                                            | 29.5                                     | 34.2 [45]                                                               |
| Unknown                  | -                                   | 0.9 [46]                                                            | -                                     | 10.8[44]                                                             | -                                        | -                                                                       |
| <i>Parity</i>            |                                     |                                                                     |                                       |                                                                      |                                          |                                                                         |
| No previous children     | 41.1                                | 40.1 [43]                                                           | 48.3                                  | 43.3 [44]                                                            | 47.9                                     | 43.8 [45]                                                               |
| <i>Educational level</i> |                                     |                                                                     |                                       |                                                                      |                                          |                                                                         |
| Less than high school    | 2.7                                 | 17.4 [47]                                                           | 1.3                                   | 8.4 [48]                                                             | 0.5                                      | 20.6 [49]                                                               |
| High-school              | 25.3                                | 24.4 [47]                                                           | 24.6                                  | -                                                                    | 29.0                                     |                                                                         |
| More than high school    | 62.0                                | 58.2 [47]                                                           | 67.8                                  | 69.6 [48]                                                            | 63.1                                     | 56.0 [50]                                                               |



|                                            | Study sample in<br>The USA<br>n=297 | General<br>birthing<br>population in<br>USA<br>LB=3,999,386<br>[43] | Study<br>sample in<br>Canada<br>n=236 | General<br>birthing<br>population in<br>Canada<br>LB=377,636<br>[44] | Study<br>sample in<br>Australia<br>n=217 | General<br>birthing<br>population in<br>Australia<br>LB=301,617<br>[45] |
|--------------------------------------------|-------------------------------------|---------------------------------------------------------------------|---------------------------------------|----------------------------------------------------------------------|------------------------------------------|-------------------------------------------------------------------------|
|                                            | n (%)                               | (%)                                                                 | n (%)                                 | (%)                                                                  | n (%)                                    | (%)                                                                     |
| Other                                      | 10.1                                | -                                                                   | 6.4                                   | -                                                                    | 7.4                                      | -                                                                       |
| <i>Women smoking before pregnancy</i>      | 28.3                                | 21.5 [51]                                                           | 29.2                                  | 22.0 [52]                                                            | 29.1                                     | 29.9 [53]                                                               |
| <i>Women smoking during pregnancy</i>      | 8.1                                 | 10.2 [54]                                                           | 16.1                                  | 13.4 [48]                                                            | 14.3                                     | 14.5 [55]                                                               |
| <i>Use of alcohol during pregnancy</i>     | 17.5                                | 15.5 [51]                                                           | 16.1                                  | 10.5 [48]                                                            | 27.2                                     | 29.0 [56]                                                               |
| <i>No. of respondents/No. live births*</i> | 0.04%                               |                                                                     | 0.4%                                  |                                                                      | 0.4%                                     |                                                                         |

Abbreviations: LB: Number of live births per year.

\*The ratio “No. of respondents/No. live births” is calculated as the proportion (%) of pregnancies included in the study among live births in the country in two months (period of data collection).

#### References

1. **UK National Statistics. Characteristics of Birth 1 and 2/of mother 1 and 2, England and Wales. 2010**  
[<http://www.statistics.gov.uk/hub/population/births-and-fertility/maternalities/index.html>]. Last accessed: November 12, 2012.
2. **Eurostat. Live births by mother's age at last birthday and legal marital status**  
[[http://appsso.eurostat.ec.europa.eu/nui/show.do?dataset=demo\\_fagec&lang=en](http://appsso.eurostat.ec.europa.eu/nui/show.do?dataset=demo_fagec&lang=en)]. Last accessed: November 6, 2012.
3. **Istat - Istituto nazionale di statistica. Demography in figures. 2011** [[http://demo.istat.it/index\\_e.html](http://demo.istat.it/index_e.html)]. Last accessed: November 6, 2012.

4. **Swiss Statistics. Components of population change - Data, indicators.**  
[<http://www.bfs.admin.ch/bfs/portal/en/index/themen/01/06/blank/key/01.html>]. Last accessed: November 6, 2012.
5. Donati S, Baglio G, Spinelli A, Grandolfo ME: **Drug use in pregnancy among Italian women.** *Eur J Clin Pharmacol* 2000, **56**(4):323-328.
6. **Eurostat. Persons with a given education attainment level by sex and age groups (%).**  
[[http://epp.eurostat.ec.europa.eu/portal/page/portal/product\\_details/dataset?p\\_product\\_code=EDAT\\_LFS\\_9903](http://epp.eurostat.ec.europa.eu/portal/page/portal/product_details/dataset?p_product_code=EDAT_LFS_9903)]. Last accessed: November 6, 2012.
7. **Eurostat. Smokers by sex** [[http://epp.eurostat.ec.europa.eu/portal/page/portal/product\\_details/dataset?p\\_product\\_code=TPS00169](http://epp.eurostat.ec.europa.eu/portal/page/portal/product_details/dataset?p_product_code=TPS00169)]. Last accessed: November 6, 2012.
8. **The Health and Social Care Information Centre. Statistics on women's smoking status at time of delivery: England, Quarter 1, 2012/13** [<http://www.ic.nhs.uk/pubs/wsstd1213q1>]. Last accessed: November 12, 2012.
9. De Santis M, De Luca C, Mappa I, Quattrocchi T, Angelo L, Cesari E: **Smoke, alcohol consumption and illicit drug use in an Italian population of pregnant women.** *Eur J Obstet Gynecol Reprod Biol* 2011, **159**(1):106-110.
10. Lemola S, Grob A: **Drinking and smoking in pregnancy: what questions do Swiss physicians ask?** *Swiss medical weekly* 2007, **137**(3-4):66-69.

11. Sayal K, Heron J, Golding J, Alati R, Smith GD, Gray R, Emond A: **Binge pattern of alcohol consumption during pregnancy and childhood mental health outcomes: longitudinal population-based study.** *Pediatrics* 2009, **123**(2):e289-296.
12. **National Institute of Statistics and Economic Studies INSEE. Population** [<http://www.insee.fr/en/themes/theme.asp?theme=2>]. Last accessed: November 7, 2012.
13. **Statline, Centraal Bureaus voor de Statistiek. Population.** [<http://www.cbs.nl/en-GB/menu/themas/bevolking/nieuws/default.htm>]. Last accessed: November 10, 2012.
14. **Statistics Austria. Births. Long-term trend and current final annual results. 2011** [[http://www.statistik.at/web\\_en/statistics/population/births/index.html](http://www.statistik.at/web_en/statistics/population/births/index.html)]. Last accessed: November 6, 2012.
15. **STATcube - Statistical Database of Statistics Austria** [<http://statcube.at/superweb/login.do?guest=guest>]. Last accessed: November 12, 2012.
16. Menai M, Heude B, Slama R, Forhan A, Sahuquillo J, Charles M-A, Yazbeck C: **Association between maternal blood cadmium during pregnancy and birth weight and the risk of fetal growth restriction: The EDEN mother–child cohort study.** *Reprod Toxicol* 2012, **34**(4):622-627.
17. **Jahrbuch der GESUNDHEITSSTATISTIK.** Wein: Statistika Austria. 2011.
18. Leermakers ET, Taal HR, Bakker R, Steegers EA, Hofman A, Jaddoe VW: **A common genetic variant at 15q25 modifies the associations of maternal smoking during pregnancy with fetal growth: the generation R study.** *PloS one* 2012, **7**(4):e34584.

19. De Chazeron I, Llorca P-M, Ughetto S, Vendittelli F, Boussiron D, Sapin V, Coudore F, Lemery D: **Is Pregnancy the Time to Change Alcohol Consumption Habits in France?** *Alcohol Clin Exp Res* 2008, **32**(5):868-873.
20. **Norwegian Institute of Public Health. Medisinsk fødselsregisters statistikkbank - statistikk om alle fødsler i Norge** [<http://mfr-nesstar.uib.no/mfr/>]. Last accessed: November 12, 2012.
21. Heino A, Gissler M: **Nordic Perinatal Statistics 2010**. Helsinki, Finland: National Institute for Health and Welfare. 2012.
22. **Liitetaulukot - Bilagetabeller - Appendix Tables**. Helsinki, Finland: National Institute for Health and Welfare. 2010.
23. Ystrom E, Vollrath ME, Nordeng H: **Effects of personality on use of medications, alcohol, and cigarettes during pregnancy**. *Eur J Clin Pharmacol* 2012, **68**(5):845-851.
24. Nilsen PER, Holmqvist M, Hultgren EVA, Bendtsen P, Cedergren M: **Alcohol use before and during pregnancy and factors influencing change among Swedish women**. *Acta Obstet Gynecol Scand* 2008, **87**(7):768-774.
25. **Statistics Iceland. Births and Deaths** [<http://www.statice.is/Statistics/Population/Births-and-deaths>]. Last accessed: November 6, 2012.
26. **The Demographic Yearbook of Russia - statistical handbook**. Moscow: Federal State Statistics Service (Rosstat). 2010.
27. **Demographic Yearbook of Poland**. Warsaw: Central Statistical Office of Poland. 2011.
28. Centers for Disease Control and Prevention: **Current tobacco use and secondhand smoke exposure among women of reproductive age - 14 countries, 2008-2010**. *MMWR Morb Mortal Wkly Rep* 2012, **61**:877-882.

29. Przewoźniak K, W Z: **Ekspertyza „zachowania zdrowotne kobiet w ciąży”**. Warszawa: Zakład Epidemiologii i Prewencji Nowotworów, Centrum Onkologii – Instytut w Warszawie. Posiedzenie Plenarne Rady Naukowej przy Ministrze Zdrowia, Ministerstwo Zdrowia; 2010
30. Kelmanson I, Erman L, Litvina S: **Maternal smoking during pregnancy and behavioural characteristics in 2 - 4-month-old infants**. *Klin Padiatr* 2002, **214**(6):359-364.
31. Hugg T, Jaakkola M, Ruotsalainen R, Pushkarev V, Jaakkola J: **Parental smoking behaviour and effects of tobacco smoke on children's health in Finland and Russia**. *Eur J Public Health* 2008, **18**(1):55-62.
32. Kristjanson AF, Wilsnack SC, Zvartau E, Tsoy M, Novikov B: **Alcohol Use in Pregnant and Nonpregnant Russian Women**. *Alcohol Clin Exp Res* 2007, **31**(2):299-307.
33. Wojtyła A, Kapka-Skrzypczak L, Diatczyk J, Fronczak A, Paprzycki P: **Alcohol-related Developmental Origin of Adult Health--population studies in Poland among mothers and newborns (2010-2012)**. *Ann Agric Environ Med* 2012, **19**(3)
34. **Statistical Yearbook of the Republic of Croatia**. Zagreb: Croatian Bureau of Statistics; 2011
35. **Statistical Yearbook of the Republic of Serbia**. Belgrade: Statistical Office of the Republic of Serbia. 2011.
36. **Statistical Office of the Republic of Slovenia. SI-STAT Data Portal. Population**  
[<http://pxweb.stat.si/pxweb/Database/Demographics/Demographics.asp>]. Last accessed: November 7, 2012.

37. Krstev S, Marinković J, Simić S, Kocev N, Bondy S: **Prevalence and predictors of smoking and quitting during pregnancy in Serbia: results of a nationally representative survey.** *Int J Public Health* 2012, **57**(6):875-883.
38. **Statistical Office of the Republic of Serbia. Women and Men in the Republic of Serbia.** Belgrade: Statistical Office of the Republic of Serbia. 2011.
39. Strinic T, Bukovic D, Sumilin L, Radic A, Hauptman D, Klobucar A: **Socio-demographic characteristics and lifestyle habits of pregnant women smokers.** *Coll Antropol* 2005, **29**(2):611-614.
40. Odalovic M, Vezmar Kovacevic S, Ilic K, Sabo A, Tasic L: **Drug use before and during pregnancy in Serbia.** *Int J Clin Pharm* 2012, **34**(5):719-727.
41. Antolic B, Gersak K, Verdenik I, Novak-Antolic Z: **Adverse effects of thyroid dysfunction on pregnancy and pregnancy outcome: epidemiologic study in Slovenia.** *J Matern Fetal Neonatal Med* 2006, **19**(10):651-654.
42. Petković G, Barišić I: **FAS prevalence in a sample of urban schoolchildren in Croatia.** *Reprod Toxicol* 2010, **29**(2):237-241.
43. Hamilton B, Martin J, Ventura S: **Births: Preliminary data for 2010.** *National vital statistics reports.* vol. 60 no 2. Hyattsville, MD: National Center for Health Statistics; 2011
44. **Statistics Canada. Births** [<http://www.statcan.gc.ca/daily-quotidien/111220/dq111220g-eng.htm>]. Last accessed: November 12, 2012.
45. **Australian Bureau of Statistics. Births, Australia, 2011** [<http://www.abs.gov.au/AUSSTATS/abs@.nsf/mf/3301.0>]. Last accessed: November 13, 2012.

46. **Panorama de la société 2011 - Les indicateurs sociaux de l'OCDE** [[www.oecd.org/els/social/indicateurs/SAG](http://www.oecd.org/els/social/indicateurs/SAG)]. Last accessed: November 12, 2012.
47. **United States Census Bureau. The 2012 Statistical Abstract. The National Data Book. Women With Births in the Past 12 Months by Citizenship Status, Educational Attainment, and Poverty Status, by State: 2009** [[http://www.census.gov/compendia/statab/cats/births\\_deaths\\_marriages\\_divorces/births.html](http://www.census.gov/compendia/statab/cats/births_deaths_marriages_divorces/births.html)]. Last accessed: November 12, 2012.
48. **Canadian Perinatal Health Report, 2008 Edition.** Ottawa: Public Health Agency of Canada. 2008.
49. Sawicki E, Stewart K, Wong S, Leung L, Paul E, George J: **Medication use for chronic health conditions by pregnant women attending an Australian maternity hospital.** *Aust N Z J Obstet Gynaecol* 2011, **51 (4)**:333-338.
50. Pink B: **Australian Social Trends September 2012.** Canberra: Australian Bureau of Statistics. 2012.
51. **Results from the 2010 National Survey on Drug Use and Health: Summary of National Findings.** NSDUH Series H-41, HHS Publication No. (SMA) 11-46 58. Rockville, MD: Substance Abuse and Mental Health Services Administration. 2011.
52. **What Mothers Say: The Canadian Maternity Experiences Survey** Ottawa: Public Health Agency of Canada. 2009.
53. Hotham E, Ali R, White J, Robinson J: **Pregnancy-related changes in tobacco, alcohol and cannabis use reported by antenatal patients at two public hospitals in South Australia.** *Aust N Z J Obstet Gynaecol* 2008, **48(3)**:248-254.
54. **Health, United States, 2011.** Hyattsville, MD: With Special Feature on Socioeconomic Status and Health. 2012.

55. Li Z, McNally L, Hilder L, Sullivan E: **Australia's mothers and babies 2009 Perinatal statistics series no. 25. Cat. no. PER 52.**  
Sydney: AIHW National Perinatal Epidemiology and Statistics Unit.
56. Maloney E, Hutchinson D, Burns L, Mattick RP, Black E: **Prevalence and Predictors of Alcohol Use in Pregnancy and Breastfeeding Among Australian Women.** *Birth* 2011, **38**(1):3-9.
