# Supplementary material for: Herbal medicine use in pregnancy: results of a multinational study
Source: PubMed Central journal article supplement (PMC4029224; doi:10.1186/1472-6882-13-355), 2013-12-12
Supplement: 1472-6882-13-355-S3.pdf [file 1472-6882-13-355-S3.pdf]

***Internet questionnaire***

***Herbal Medicine use in pregnancy:  
results of a multinational study***

*A sub-study under the  
Multinational Medication Use in Pregnancy Study*

---

## INFORMATION ABOUT YOURSELF

|                                                                                                                                                                                                                                                                                                                                                                                 |                                                                                                                                     |
|---------------------------------------------------------------------------------------------------------------------------------------------------------------------------------------------------------------------------------------------------------------------------------------------------------------------------------------------------------------------------------|-------------------------------------------------------------------------------------------------------------------------------------|
| <b>1. In which country do you live?</b><br><b>Country:</b> _____                                                                                                                                                                                                                                                                                                                | <b>In which region/province do you live?</b><br><b>Region:</b> _____                                                                |
| <b>2. Are you pregnant right now?</b><br><input type="checkbox"/> Yes                                                                                                                                                                                                                                                                                                           |                                                                                                                                     |
| <input type="checkbox"/> No                                                                                                                                                                                                                                                                                                                                                     |                                                                                                                                     |
| <b>(If yes in Q2) In which pregnancy week are you?</b><br><b>From 1 to 44</b>                                                                                                                                                                                                                                                                                                   | <b>(If No in Q2) How old is your newborn child (in weeks)?</b><br><b>0-4 / 5-8 / 9-12 / 13-16 / 17-20 / 21-24 / 25-28 / &gt; 29</b> |
| <b>3. How many children do you already have from before?</b><br><input type="checkbox"/> None<br><input type="checkbox"/> One<br><input type="checkbox"/> Two<br><input type="checkbox"/> More than two                                                                                                                                                                         |                                                                                                                                     |
| <b>4. What is your marital status?</b><br><input type="checkbox"/> Married<br><input type="checkbox"/> Cohabitant<br><input type="checkbox"/> Single<br><input type="checkbox"/> Divorced/Separated<br><input type="checkbox"/> Other                                                                                                                                           |                                                                                                                                     |
| <b>5. What is the highest education you have completed?</b><br><input type="checkbox"/> Primary school (8-9 years of education)<br><input type="checkbox"/> High-school (11-13 years of education)<br><input type="checkbox"/> University<br><input type="checkbox"/> Other education                                                                                           |                                                                                                                                     |
| <b>6. What was your work situation when you became pregnant?</b><br><input type="checkbox"/> Student<br><input type="checkbox"/> Housewife<br><input type="checkbox"/> Health care personnel, i.e., physician, nurse, or pharmacist<br><input type="checkbox"/> Employed in another sector<br><input type="checkbox"/> Job seeker<br><input type="checkbox"/> None of the above |                                                                                                                                     |
| <b>7. Your age: years</b>                                                                                                                                                                                                                                                                                                                                                       |                                                                                                                                     |

## INFORMATION ABOUT YOUR PREGNANCY

**8. Have you taken folic acid? (alone or as part of multivitamins)**

- Yes, before pregnancy
- Yes, before and during pregnancy
- Yes, only during pregnancy
- No
- cannot remember

**9. Did you smoke cigarettes before becoming pregnant?**

- Yes, regularly
- Yes, occasionally
- No, never

**(If yes in Q14 as regularly/occasionally) Do you/did you smoke during pregnancy?**

- Yes, more than before
- Yes, approximately the same
- Yes, but less
- No

**(If yes) How many cigarettes (on average) do you/did you smoke per day?**

- < 1
- 1-5
- 6-10
- > 11

**10. Did you drink any alcohol after finding out that you were pregnant?**

- Yes
- No
- Cannot remember

**(If yes) How much did you drink (in units)?**

1 alcohol unit is equivalent to:

one 25ml single measure of whisky (ABV 40%),

or a third of a pint of beer (ABV 5-6%)

or half a standard (175ml) glass of red wine (ABV 12%).

- More than 1-2 units per week
- 1-2 units per week
- 1-4 units per month
- 1-2 units during the pregnancy
- Cannot remember

## HEALTH DISORDERS AND MEDICATIONS DURING PREGNANCY

| 11. Have you experienced any of the disorders listed below during this pregnancy?<br>If you use or have used any medicines in relation to [each health disorder listed] please enter the names of the medicines.<br>In which weeks of pregnancy have you used them? |                                                             |                                                                                                                                                      |                                                                                                                         |
|---------------------------------------------------------------------------------------------------------------------------------------------------------------------------------------------------------------------------------------------------------------------|-------------------------------------------------------------|------------------------------------------------------------------------------------------------------------------------------------------------------|-------------------------------------------------------------------------------------------------------------------------|
| Health disorder                                                                                                                                                                                                                                                     |                                                             | Medicine                                                                                                                                             | Period of use<br>(pregnancy weeks)                                                                                      |
| Nausea                                                                                                                                                                                                                                                              | <input type="checkbox"/> Yes<br><input type="checkbox"/> No | (If Nausea ticked) If you use or have used any medicines in relation to nausea, please enter the names of the medicines                              | <input type="checkbox"/> week 0-12<br><input type="checkbox"/> week 13-24<br><input type="checkbox"/> week 25- delivery |
| Heartburn or reflux problems                                                                                                                                                                                                                                        | <input type="checkbox"/> Yes<br><input type="checkbox"/> No | (If Heartburn ticked) If you use or have used any medicines in relation to heartburn or reflux problem, please enter the names of the medicines      | <input type="checkbox"/> week 0-12<br><input type="checkbox"/> week 13-24<br><input type="checkbox"/> week 25- delivery |
| Constipation                                                                                                                                                                                                                                                        | <input type="checkbox"/> Yes<br><input type="checkbox"/> No | (If Constipation ticked) If you use or have used any medicines in relation to constipation, please enter the names of the medicines                  | <input type="checkbox"/> week 0-12<br><input type="checkbox"/> week 13-24<br><input type="checkbox"/> week 25- delivery |
| Common cold                                                                                                                                                                                                                                                         | <input type="checkbox"/> Yes<br><input type="checkbox"/> No | (If common cold ticked) If you use or have used any medicines in relation to common cold, please enter the names of the medicines                    | <input type="checkbox"/> week 0-12<br><input type="checkbox"/> week 13-24<br><input type="checkbox"/> week 25- delivery |
| Urinary tract infections                                                                                                                                                                                                                                            | <input type="checkbox"/> Yes<br><input type="checkbox"/> No | (If UTI ticked) If you use or have used any medicines in relation to urinary tract infections, please enter the names of the medicines               | <input type="checkbox"/> week 0-12<br><input type="checkbox"/> week 13-24<br><input type="checkbox"/> week 25- delivery |
| Other infections                                                                                                                                                                                                                                                    | <input type="checkbox"/> Yes<br><input type="checkbox"/> No | (If other infections ticked) If you use or have used any medicines in relation to other infections, please enter the names of the medicines          | <input type="checkbox"/> week 0-12<br><input type="checkbox"/> week 13-24<br><input type="checkbox"/> week 25- delivery |
| Pain in neck or back or pelvic girdle                                                                                                                                                                                                                               | <input type="checkbox"/> Yes<br><input type="checkbox"/> No | (If pain ticked) If you use or have used any medicines in relation to pain in neck or back or pelvic girdle, please enter the names of the medicines | <input type="checkbox"/> week 0-12<br><input type="checkbox"/> week 13-24<br><input type="checkbox"/> week 25- delivery |
| Headache                                                                                                                                                                                                                                                            | <input type="checkbox"/> Yes<br><input type="checkbox"/> No | (If headache ticked) If you use or have used any medicines in relation to headache, please enter the names of the medicines                          | <input type="checkbox"/> week 0-12<br><input type="checkbox"/> week 13-24<br><input type="checkbox"/> week 25- delivery |
| Sleeping problems                                                                                                                                                                                                                                                   | <input type="checkbox"/> Yes<br><input type="checkbox"/> No | (If sleeping problems ticked) If you use or have used any medicines in relation to sleeping problems, please enter the names of the medicines        | <input type="checkbox"/> week 0-12<br><input type="checkbox"/> week 13-24<br><input type="checkbox"/> week 25- delivery |

**12. Did you take any herbal preparations during pregnancy (e.g. ginger, Echinacea, valerian, cranberries)?**

- Yes  No  Cannot remember

**(If yes) Please provide the name of all herbal preparations you have taken during pregnancy.**

**(If yes) What was the reason for taking herbal preparations (health disorder, illness)?**

**(If yes) In which pregnancy weeks did you take herbal preparations?**

| Name of herbal preparation used | Reason for use (health disorder, illness) | Period of use (pregnancy week)                                                                                          |
|---------------------------------|-------------------------------------------|-------------------------------------------------------------------------------------------------------------------------|
| <hr/> <hr/> <hr/>               | <hr/> <hr/> <hr/>                         | <input type="checkbox"/> week 0-12<br><input type="checkbox"/> week 13-24<br><input type="checkbox"/> week 25- delivery |
| <hr/> <hr/> <hr/>               | <hr/> <hr/> <hr/>                         | <input type="checkbox"/> week 0-12<br><input type="checkbox"/> week 13-24<br><input type="checkbox"/> week 25- delivery |

**13. (If you used herbal preparations during pregnancy) Who recommended to you to take herbal preparations during pregnancy? (You may tick more than one answer)**

- My own initiative
- Family/friends
- Physician
- Midwife/Nurse
- Pharmacy personnel
- Herbal shop personnel
- Internet
- Magazines, media, etc.
- Other (please specify: \_\_\_\_\_ )

**14. Did you use homeopathic products during pregnancy?**

- Yes  No  Cannot remember

**(If yes in Q22 above) What was the reason for use?**

\_\_\_\_\_

**MEDICATIONS FOR CHRONIC DISEASES DURING PREGNANCY**

If you use or have used medicines for a chronic disease during your pregnancy fill out this part of the questionnaire (I, II, III) and provide some information about those medicines you use daily.

Do you suffer of any chronic disease?       Yes       No

**(If Yes above) Please indicate whether you suffer of any of the following chronic diseases.**

|                                                                                   |                                                             | <b>If you use or have used medicines for X during your pregnancy, please enter the name of the medicines.</b>                                       | <b>In which weeks of pregnancy did you use them?</b>                                                                   |
|-----------------------------------------------------------------------------------|-------------------------------------------------------------|-----------------------------------------------------------------------------------------------------------------------------------------------------|------------------------------------------------------------------------------------------------------------------------|
| Asthma                                                                            | <input type="checkbox"/> Yes<br><input type="checkbox"/> No | (If Asthma ticked) If you use or have used medicines for asthma during pregnancy, please enter the names of the medicines.                          | <input type="checkbox"/> week 0-12<br><input type="checkbox"/> week 13-24<br><input type="checkbox"/> week 25-delivery |
| Allergy                                                                           | <input type="checkbox"/> Yes<br><input type="checkbox"/> No | (If Allergy ticked) If you use or have used medicines for allergy during pregnancy, please enter the names of the medicines.                        | <input type="checkbox"/> week 0-12<br><input type="checkbox"/> week 13-24<br><input type="checkbox"/> week 25-delivery |
| Hypothyroidism (low thyroid hormone)                                              | <input type="checkbox"/> Yes<br><input type="checkbox"/> No | (If Hypothyroidism ticked) If you use or have used medicines for hypothyroidism during pregnancy, please enter the names of the medicines.          | <input type="checkbox"/> week 0-12<br><input type="checkbox"/> week 13-24<br><input type="checkbox"/> week 25-delivery |
| Rheumatic disorders (incl. rheumatoid arthritis, psoriatic arthritis)             | <input type="checkbox"/> Yes<br><input type="checkbox"/> No | (If Rheumatic disorders ticked) If you use or have used medicines for rheumatic disorder during pregnancy, please enter the names of the medicines. | <input type="checkbox"/> week 0-12<br><input type="checkbox"/> week 13-24<br><input type="checkbox"/> week 25-delivery |
| Diabetes (type I or II)                                                           | <input type="checkbox"/> Yes<br><input type="checkbox"/> No | (If Diabetes ticked) If you use or have used medicines for diabetes during pregnancy, please enter the names of the medicines.                      | <input type="checkbox"/> week 0-12<br><input type="checkbox"/> week 13-24<br><input type="checkbox"/> week 25-delivery |
| Epilepsy                                                                          | <input type="checkbox"/> Yes<br><input type="checkbox"/> No | (If Epilepsy ticked) If you use or have used medicines for epilepsy during pregnancy, please enter the names of the medicines.                      | <input type="checkbox"/> week 0-12<br><input type="checkbox"/> week 13-24<br><input type="checkbox"/> week 25-delivery |
| Depression                                                                        | <input type="checkbox"/> Yes<br><input type="checkbox"/> No | (If Depression ticked) If you use or have used medicines for depression, please enter the names of the medicines.                                   | <input type="checkbox"/> week 0-12<br><input type="checkbox"/> week 13-24<br><input type="checkbox"/> week 25-delivery |
| Anxiety                                                                           | <input type="checkbox"/> Yes<br><input type="checkbox"/> No | (If Anxiety ticked) If you use or have used medicines for anxiety during pregnancy, please enter the names of the medicines.                        | <input type="checkbox"/> week 0-12<br><input type="checkbox"/> week 13-24<br><input type="checkbox"/> week 25-delivery |
| Cardiovascular diseases (incl. hypertension, high cholesterol, heart diseases)    | <input type="checkbox"/> Yes<br><input type="checkbox"/> No | (If Cardio disease ticked) If you use or have used medicines for cardiovascular diseases during pregnancy, please enter the names of the medicines. | <input type="checkbox"/> week 0-12<br><input type="checkbox"/> week 13-24<br><input type="checkbox"/> week 25-delivery |
| Others<br>(If Others ticked)<br>(Please specify which other disease(s):<br>_____) | <input type="checkbox"/> Yes<br><input type="checkbox"/> No | (If Other disease ticked) If you use or have used medicines for your chronic disease during pregnancy, please enter the names of the medicines.     | <input type="checkbox"/> week 0-12<br><input type="checkbox"/> week 13-24<br><input type="checkbox"/> week 25-delivery |

## YOUR VIEWS ABOUT MEDICATIONS

**We would like to ask you about your personal views about medicines. There are no right or wrong answers. We are interested in your personal views.**

| <b>15. These are statements other people have made about medicines in general. Please specify how much you agree or disagree with them by ticking where appropriate. (You may only tick once per line)</b> |                       |                       |                       |                       |                          |
|------------------------------------------------------------------------------------------------------------------------------------------------------------------------------------------------------------|-----------------------|-----------------------|-----------------------|-----------------------|--------------------------|
|                                                                                                                                                                                                            | <b>Strongly agree</b> | <b>Agree</b>          | <b>Uncertain</b>      | <b>Disagree</b>       | <b>Strongly disagree</b> |
| Without medicines doctors would be less able to cure people                                                                                                                                                | <input type="radio"/> | <input type="radio"/> | <input type="radio"/> | <input type="radio"/> | <input type="radio"/>    |
| Doctors use too many medicines                                                                                                                                                                             | <input type="radio"/> | <input type="radio"/> | <input type="radio"/> | <input type="radio"/> | <input type="radio"/>    |
| People who take medicines should stop their treatment for a while every now and again                                                                                                                      | <input type="radio"/> | <input type="radio"/> | <input type="radio"/> | <input type="radio"/> | <input type="radio"/>    |
| Most medicines are addictive                                                                                                                                                                               | <input type="radio"/> | <input type="radio"/> | <input type="radio"/> | <input type="radio"/> | <input type="radio"/>    |
| Natural remedies are safer than medicines                                                                                                                                                                  | <input type="radio"/> | <input type="radio"/> | <input type="radio"/> | <input type="radio"/> | <input type="radio"/>    |
| Medicines do more harm than good                                                                                                                                                                           | <input type="radio"/> | <input type="radio"/> | <input type="radio"/> | <input type="radio"/> | <input type="radio"/>    |
| Medicines help many people to live better lives                                                                                                                                                            | <input type="radio"/> | <input type="radio"/> | <input type="radio"/> | <input type="radio"/> | <input type="radio"/>    |
| Medicines help many people to live longer                                                                                                                                                                  | <input type="radio"/> | <input type="radio"/> | <input type="radio"/> | <input type="radio"/> | <input type="radio"/>    |
| All medicines are poisons                                                                                                                                                                                  | <input type="radio"/> | <input type="radio"/> | <input type="radio"/> | <input type="radio"/> | <input type="radio"/>    |
| Doctors place too much trust on medicines                                                                                                                                                                  | <input type="radio"/> | <input type="radio"/> | <input type="radio"/> | <input type="radio"/> | <input type="radio"/>    |
| If doctors had more time with patients they would prescribe fewer medicines                                                                                                                                | <input type="radio"/> | <input type="radio"/> | <input type="radio"/> | <input type="radio"/> | <input type="radio"/>    |
| In most cases the benefits of medicines outweigh the risks                                                                                                                                                 | <input type="radio"/> | <input type="radio"/> | <input type="radio"/> | <input type="radio"/> | <input type="radio"/>    |

**16. Below are some statements about use of medicines in pregnancy.**

**Please specify how much you agree or disagree with these statements by ticking where appropriate. (You may only tick once per line)**

|                                                                                                                 | <b>Strongly agree</b> | <b>Agree</b>          | <b>Uncertain</b>      | <b>Disagree</b>       | <b>Strongly disagree</b> |
|-----------------------------------------------------------------------------------------------------------------|-----------------------|-----------------------|-----------------------|-----------------------|--------------------------|
| I have a higher threshold for using medicines when I am pregnant than when I'm not pregnant                     | <input type="radio"/> | <input type="radio"/> | <input type="radio"/> | <input type="radio"/> | <input type="radio"/>    |
| Even though I am ill and could have taken medicines, it is better for the foetus that I refrain from using them | <input type="radio"/> | <input type="radio"/> | <input type="radio"/> | <input type="radio"/> | <input type="radio"/>    |
| Pregnant women should preferably use herbal remedies than conventional medicines                                | <input type="radio"/> | <input type="radio"/> | <input type="radio"/> | <input type="radio"/> | <input type="radio"/>    |



## YOUR ASSESSMENT OF PREGNANCY RISKS

**17. Among 100 healthy women in a healthy environment, how many do you think will give birth to a child with a birth defect?**

---

**18. Here below is a list with various medicines, food and other substances.**

Please indicate how harmful you think they are for the foetus in a scale from 0 to 10, where 0 corresponds to 'not harmful' and 10 to 'very harmful'.

If you have not heard before about such substance, tick 'unknown substance'.

|                                                                     | Unknown substance     | 0                     | 1                     | 2                     | 3                     | 4                     | 5                     | 6                     | 7                     | 8                     | 9                     | 10                    |
|---------------------------------------------------------------------|-----------------------|-----------------------|-----------------------|-----------------------|-----------------------|-----------------------|-----------------------|-----------------------|-----------------------|-----------------------|-----------------------|-----------------------|
| Paracetamol/                                                        | <input type="radio"/> | <input type="radio"/> | <input type="radio"/> | <input type="radio"/> | <input type="radio"/> | <input type="radio"/> | <input type="radio"/> | <input type="radio"/> | <input type="radio"/> | <input type="radio"/> | <input type="radio"/> | <input type="radio"/> |
| Antibiotics ( <i>e.g. Penicillins</i> )                             | <input type="radio"/> | <input type="radio"/> | <input type="radio"/> | <input type="radio"/> | <input type="radio"/> | <input type="radio"/> | <input type="radio"/> | <input type="radio"/> | <input type="radio"/> | <input type="radio"/> | <input type="radio"/> | <input type="radio"/> |
| Antidepressants                                                     | <input type="radio"/> | <input type="radio"/> | <input type="radio"/> | <input type="radio"/> | <input type="radio"/> | <input type="radio"/> | <input type="radio"/> | <input type="radio"/> | <input type="radio"/> | <input type="radio"/> | <input type="radio"/> | <input type="radio"/> |
| Thalidomide                                                         | <input type="radio"/> | <input type="radio"/> | <input type="radio"/> | <input type="radio"/> | <input type="radio"/> | <input type="radio"/> | <input type="radio"/> | <input type="radio"/> | <input type="radio"/> | <input type="radio"/> | <input type="radio"/> | <input type="radio"/> |
| Swine influenza vaccine                                             | <input type="radio"/> | <input type="radio"/> | <input type="radio"/> | <input type="radio"/> | <input type="radio"/> | <input type="radio"/> | <input type="radio"/> | <input type="radio"/> | <input type="radio"/> | <input type="radio"/> | <input type="radio"/> | <input type="radio"/> |
| OTC medicines against nausea/travel sickness                        | <input type="radio"/> | <input type="radio"/> | <input type="radio"/> | <input type="radio"/> | <input type="radio"/> | <input type="radio"/> | <input type="radio"/> | <input type="radio"/> | <input type="radio"/> | <input type="radio"/> | <input type="radio"/> | <input type="radio"/> |
| Ginger                                                              | <input type="radio"/> | <input type="radio"/> | <input type="radio"/> | <input type="radio"/> | <input type="radio"/> | <input type="radio"/> | <input type="radio"/> | <input type="radio"/> | <input type="radio"/> | <input type="radio"/> | <input type="radio"/> | <input type="radio"/> |
| Cranberries                                                         | <input type="radio"/> | <input type="radio"/> | <input type="radio"/> | <input type="radio"/> | <input type="radio"/> | <input type="radio"/> | <input type="radio"/> | <input type="radio"/> | <input type="radio"/> | <input type="radio"/> | <input type="radio"/> | <input type="radio"/> |
| Blue veined cheese ( <i>e.g. Gorgonzola</i> )                       | <input type="radio"/> | <input type="radio"/> | <input type="radio"/> | <input type="radio"/> | <input type="radio"/> | <input type="radio"/> | <input type="radio"/> | <input type="radio"/> | <input type="radio"/> | <input type="radio"/> | <input type="radio"/> | <input type="radio"/> |
| Eggs                                                                | <input type="radio"/> | <input type="radio"/> | <input type="radio"/> | <input type="radio"/> | <input type="radio"/> | <input type="radio"/> | <input type="radio"/> | <input type="radio"/> | <input type="radio"/> | <input type="radio"/> | <input type="radio"/> | <input type="radio"/> |
| Alcohol during the 1. trimester ( <i>e.g. wine, beer, spirits</i> ) | <input type="radio"/> | <input type="radio"/> | <input type="radio"/> | <input type="radio"/> | <input type="radio"/> | <input type="radio"/> | <input type="radio"/> | <input type="radio"/> | <input type="radio"/> | <input type="radio"/> | <input type="radio"/> | <input type="radio"/> |
| Smoking ( <i>e.g. cigarettes</i> )                                  | <input type="radio"/> | <input type="radio"/> | <input type="radio"/> | <input type="radio"/> | <input type="radio"/> | <input type="radio"/> | <input type="radio"/> | <input type="radio"/> | <input type="radio"/> | <input type="radio"/> | <input type="radio"/> | <input type="radio"/> |
| Dental X-ray                                                        | <input type="radio"/> | <input type="radio"/> | <input type="radio"/> | <input type="radio"/> | <input type="radio"/> | <input type="radio"/> | <input type="radio"/> | <input type="radio"/> | <input type="radio"/> | <input type="radio"/> | <input type="radio"/> | <input type="radio"/> |
