# Supplementary material for: Herbal medicine use in pregnancy: results of a multinational study
Source: PubMed Central journal article supplement (PMC4029224; doi:10.1186/1472-6882-13-355), 2013-12-12
Supplement: 1472-6882-13-355-S4.pdf [file 1472-6882-13-355-S4.pdf]

**Additional file 4:** The ten most common reasons for using herbal medicines and the most frequently used herbs.

| Reason for use                         | Overall |            |                                                         | Western Europe |            |                                                     | Northern Europe |            |                                                    | Eastern Europe |            |                                                         |
|----------------------------------------|---------|------------|---------------------------------------------------------|----------------|------------|-----------------------------------------------------|-----------------|------------|----------------------------------------------------|----------------|------------|---------------------------------------------------------|
|                                        | N       | % ± SE     | Top herbs                                               | N              | % ± SE     | Top herbs                                           | N               | % ± SE     | Top herbs                                          | N              | % ± SE     | Top herbs                                               |
| Cold or flu                            | 620     | 18.6 ± 0.7 | Cranberry, Echinacea, Garlic, Ginger, Raspberry         | 136            | 13.9 ± 1.1 | Echinacea, Lemon, Eucalyptus, Peppermint, Sambucus  | 44              | 12.9 ± 1.8 | Echinacea, Ginger, Sambucus, Peppermint, , Primula | 400            | 24.5 ± 1.1 | Cranberry, Raspberry, Garlic, Rutin, Chamomile          |
| Nausea                                 | 548     | 16.5 ± 0.6 | Ginger, Peppermint, Artichoke, Lemon                    | 224            | 22.9 ± 1.3 | Ginger, Peppermint, Fennel, Lemon, Raspberry        | 112             | 32.8 ± 2.5 | Ginger                                             | 120            | 7.3 ± 0.6  | Ginger, Artichoke, Peppermint                           |
| Urinary tract infections               | 476     | 14.3 ± 0.6 | Cranberry, Dog rose, Rosemary, Seaside centaury, Lovage | 75             | 7.7 ± 0.9  | Cranberry                                           | 63              | 18.5 ± 2.1 | Cranberry                                          | 321            | 19.6 ± 1.0 | Cranberry, Dog rose, Rosemary, Seaside centaury, Lovage |
| Sedative/sleeping problems             | 447     | 13.4 ± 0.6 | Valerian, Motherwort, Lemon balm, Chamomile, Peppermint | 100            | 10.2 ± 1.0 | Valerian, Passiflora, Chamomile, Lemon balm         | 6               | 1.8 ± 0.7  | **                                                 | 317            | 19.4 ± 1.0 | Valerian, Motherwort, Lemon balm, Peppermint, Chamomile |
| Constipation                           | 304     | 9.1 ± 0.5  | Psyllium, Fiber crops, Senna, Prunes, Flax              | 136            | 13.9 ± 1.1 | Psyllium, Fiber crops, Senna, Prunes, Aloe vera     | 26              | 7.6 ± 1.4  | Prunes, Psyllium, Fiber crops, Flax                | 54             | 3.3 ± 0.4  | Psyllium, Prunes, Senna, Fiber crops, Fennel            |
| Preparation for labour                 | 206     | 6.2 ± 0.4  | Raspberry, Evening primrose, Sage, Nettle, Fennel       | 119            | 12.2 ± 1.0 | Raspberry, Evening primrose, Sage                   | 34              | 10.0 ± 1.6 | Raspberry, Evening primrose                        | 16             | 1.0 ± 0.2  | Raspberry                                               |
| Health promotion                       | 117     | 3.5 ± 0.3  | Cranberry, Ginger, Echinacea, Raspberry, Chamomile      | 31             | 3.2 ± 0.6  | Echinacea, Cranberry, Ginger, Nettle, Lady's Mantle | 12              | 3.5 ± 1.0  | Cranberry, Aloe vera                               | 63             | 3.9 ± 0.5  | Cranberry, Ginger, Dog rose, Lemon, Chamomile           |
| Water retention                        | 94      | 2.8 ± 0.3  | Cowberry, Cranberry, Dog rose, St. John's wort, Bidens  | 3              | *          | Nettle                                              | 1               | *          | **                                                 | 87             | 5.3 ± 0.6  | Cowberry, Cranberry, Dog rose, St. John's wort, Bidens  |
| Gastrointestinal disorders, flatulence | 89      | 2.7 ± 0.3  | Ginger, Peppermint, Chamomile, Fennel, Cranberry        | 40             | 4.1 ± 0.6  | Ginger, Peppermint, Fennel, Chamomile               | 3               | 0.9 ± 0.5  | **                                                 | 27             | 1.7 ± 0.3  | Ginger, Peppermint, Cranberry                           |
| Pain conditions                        | 65      | *          | Peppermint, Lemon balm, Lemon, Cinnamon, Cloves         | 14             | 1.4 ± 0.4  | **                                                  | 8               | 2.3 ± 0.8  | Ginger                                             | 34             | 2.1 ± 0.4  | Peppermint, Lemon balm, Lemon, Cinnamon, Cloves         |

SE: Standard error. Standard errors were calculated for all percentages; however, where the SE > 50% the point estimate is not reported and an “\*” is used.

Note: The top 5 herbs are presented where more than 2 women used an herbal medicine. \*\* no one herb was used by more than 2 women

| Reason for use                         | North America |            |                            | South America |            |                                      | Australia |            |                    |
|----------------------------------------|---------------|------------|----------------------------|---------------|------------|--------------------------------------|-----------|------------|--------------------|
|                                        | N             | % ± SE     | Top herbs                  | N             | % ± SE     | Top herbs                            | N         | % ± SE     | Top herbs          |
| Cold or flu                            | 20            | 10.9 ± 2.3 | Echinacea, Ginger, Garlic  | 13            | 16.7 ± 4.2 | Chamomile                            | 7         | 6.1 ± 2.2  | Echinacea          |
| Nausea                                 | 43            | 23.4 ± 3.1 | Ginger, Peppermint         | 4             | 5.1 ± 2.5  | **                                   | 45        | 39.5 ± 4.6 | Ginger, Peppermint |
| Urinary tract infections               | 7             | 3.8 ± 1.4  | Cranberry                  | 3             | *          | **                                   | 7         | 6.1 ± 2.2  | Cranberry          |
| Sedative/sleeping problems             | 14            | 7.6 ± 2.0  | Chamomile, Valerian        | 9             | 11.5 ± 3.6 | **                                   | 1         | *          | **                 |
| Constipation                           | 43            | 23.4 ± 3.1 | Psyllium, Fiber crops      | 19            | 24.4 ± 4.9 | Psyllium, Senna, Prunes, Fiber crops | 26        | 22.8 ± 3.9 | Psyllium           |
| Preparation for labour                 | 20            | 10.9 ± 2.3 | Raspberry, Nettle, Alfalfa | 0             | -          | -                                    | 17        | 14.9 ± 3.3 | Raspberry          |
| Health promotion                       | 6             | 3.3 ± 1.3  | Ginger, Raspberry          | 3             | *          | **                                   | 2         | *          | **                 |
| Water retention                        | 0             | -          | -                          | 2             | *          | **                                   | 1         | *          | **                 |
| Gastrointestinal disorders, flatulence | 9             | 4.9 ± 1.6  | Ginger                     | 9             | 11.5 ± 3.6 | Chamomile, Peppermint                | 1         | *          | **                 |
| Pain conditions                        | 4             | 2.2 ± 1.1  | **                         | 5             | 6.4 ± 2.8  | **                                   | 0         | -          | **                 |

SE: Standard error. Standard errors were calculated for all percentages; however, where the SE > 50% the point estimate is not reported and an “\*” is used.

Note: The top 5 herbs are presented where more than 2 women used an herbal medicine. \*\* no one herb was used by more than 2 women
