# Supplementary material for: Herbal medicine use in pregnancy: results of a multinational study
Source: PubMed Central journal article supplement (PMC4029224; doi:10.1186/1472-6882-13-355), 2013-12-12
Supplement: 1472-6882-13-355-S5.pdf [file 1472-6882-13-355-S5.pdf]

Additional file 5: Factors associated with herbal medicine use, overall and by region

|                                                      | Overall |        |                           | Western Europe |        |                            | Northern Europe |        |                           | Eastern Europe |        |                           |
|------------------------------------------------------|---------|--------|---------------------------|----------------|--------|----------------------------|-----------------|--------|---------------------------|----------------|--------|---------------------------|
|                                                      | N*      | (%)    | aOR (95% CI)              | N              | (%)    | aOR (95% CI)               | N               | %      | aOR (95% CI)              | N              | %      | aOR (95% CI)              |
| <b>Region of residence</b>                           | -       | -      | -                         | 842            | (26.8) | Reference                  | 305             | (11.0) | <b>0.34 (0.30 - 0.40)</b> | 1,202          | (52.0) | <b>2.97 (2.62 - 3.36)</b> |
| <b>Maternal age (years)</b>                          |         |        |                           |                |        |                            |                 |        |                           |                |        |                           |
| <= 20                                                | 69      | (23.0) | 0.76 (0.56 - 1.05)        | 10             | (16.4) | <b>0.39 (0.19 - 0.82)</b>  | 16              | (16.7) | 1.40 (0.74 - 2.62)        | 56             | (62.9) | <b>1.68 (1.00 - 2.74)</b> |
| 21 - 30                                              | 1,515   | (29.6) | Reference                 | 371            | (26.8) | Reference                  | 197             | (11.8) | Reference                 | 846            | (55.3) | Reference                 |
| 31 - 40                                              | 1,001   | (27.0) | 0.94 (0.85 - 1.05)        | 481            | (29.1) | 1.16 (0.98 - 1.38)         | 120             | (11.9) | 1.00 (0.77 - 1.30)        | 302            | (43.3) | <b>0.65 (0.54 - 0.79)</b> |
| >= 40                                                | 21      | (12.7) | <b>0.34 (0.21 - 0.55)</b> | 26             | (25.0) | 0.92 (0.57 - 1.48)         | 2               | (4.9)  | 0.38 (0.09 - 1.61)        | 9              | (36.0) | 0.48 (0.20 - 1.14)        |
| <b>Previous children</b>                             |         |        |                           |                |        |                            |                 |        |                           |                |        |                           |
| No                                                   | 1,4832  | (30.9) | Reference                 | 539            | (30.7) | Reference                  | 151             | (11.3) | Reference                 | 668            | (56.8) | Reference                 |
| Yes                                                  | 1,174   | (25.2) | <b>0.78 (0.71 - 0.87)</b> | 349            | (24.1) | <b>0.66 (0.56 - 0.79)</b>  | 184             | (12.4) | 1.15 (0.90 - 1.47)        | 545            | (46.7) | <b>0.77 (0.65 - 0.92)</b> |
| <b>Marital Status</b>                                |         |        |                           |                |        |                            |                 |        |                           |                |        |                           |
| Married/cohabitating                                 | 2,470   | (28.3) | Reference                 | 843            | (27.7) | Reference                  | 318             | (11.8) | Reference                 | 1,134          | (51.3) | Reference                 |
| Single/divorced/other                                | 136     | (24.2) | 0.93 (0.75 - 1.17)        | 45             | (28.3) | 1.15 (0.79 - 1.67)         | 17              | (13.1) | 1.12 (0.65 - 1.95)        | 79             | (60.3) | <b>1.59 (1.08 - 2.35)</b> |
| <b>Working status</b>                                |         |        |                           |                |        |                            |                 |        |                           |                |        |                           |
| Employed but not as HCP                              | 1,664   | (30.1) | Reference                 | 542            | (26.7) | Reference                  | 194             | (12.7) | Reference                 | 791            | (53.3) | Reference                 |
| Student                                              | 267     | (32.0) | <b>1.39 (1.16 - 1.67)</b> | 36             | (36.0) | <b>2.03 (1.28 - 3.22)</b>  | 60              | (16.2) | 1.31 (0.94 - 1.84)        | 156            | (60.2) | 1.11 (0.84 - 1.48)        |
| Housewife                                            | 219     | (26.8) | 1.00 (0.83 - 1.21)        | 101            | (28.2) | 1.34 (1.02 - 1.75)         | 19              | (14.0) | 1.10 (0.65 - 1.86)        | 75             | (46.0) | 0.86 (0.61 - 1.21)        |
| HCP                                                  | 282     | (22.8) | <b>0.80 (0.69 - 0.94)</b> | 121            | (32.0) | 1.26 (0.99 - 1.60)         | 37              | (7.0)  | <b>0.51 (0.35 - 0.74)</b> | 102            | (45.7) | 0.75 (0.56 - 1.00)        |
| Job seeker                                           | 77      | (19.0) | <b>0.64 (0.49 - 0.85)</b> | 43             | (28.7) | 1.31 (0.90 - 1.91)         | 11              | (8.7)  | 0.66 (0.35 - 1.27)        | 38             | (38.8) | <b>0.58 (0.37 - 0.90)</b> |
| Other than above                                     | 97      | (21.4) | <b>0.72 (0.59 - 0.92)</b> | 43             | (24.4) | 0.96 (0.66 - 1.38)         | 14              | (10.4) | 0.80 (0.45 - 1.40)        | 51             | (44.0) | 0.70 (0.47 - 1.04)        |
| <b>Education level</b>                               |         |        |                           |                |        |                            |                 |        |                           |                |        |                           |
| High school                                          | 576     | (21.8) | Reference                 | 233            | (23.1) | Reference                  | 99              | (11.7) | Reference                 | 230            | (44.1) | Reference                 |
| < High school                                        | 68      | (16.1) | 1.08 (0.81 - 1.46)        | 52             | (32.1) | <b>1.67 (1.15 - 2.43)</b>  | 23              | (13.6) | 1.15 (0.68 - 1.96)        | 14             | (37.8) | 0.81 (0.39 - 1.68)        |
| > High school                                        | 1,649   | (31.9) | <b>1.29 (1.14 - 1.46)</b> | 465            | (30.0) | <b>1.26 (1.04 - 1.52)</b>  | 163             | (11.1) | 0.96 (0.73 - 1.28)        | 862            | (53.4) | <b>1.41 (1.13 - 1.75)</b> |
| Other, unspecified                                   | 313     | (29.7) | <b>1.60 (1.34 - 1.90)</b> | 138            | (28.8) | <b>1.34 (1.04 - 1.73 )</b> | 50              | (15.2) | 1.45 (1.00 - 2.12)        | 107            | (62.6) | <b>2.01 (1.39 - 2.90)</b> |
| <b>Folic acid use before and/or during pregnancy</b> |         |        |                           |                |        |                            |                 |        |                           |                |        |                           |
| Yes                                                  | 2,503   | (29.5) | Reference                 | 851            | (30.6) | Reference                  | 311             | (12.5) | Reference                 | 1,153          | (52.7) | Reference                 |
| No                                                   | 103     | (13.0) | <b>0.43 (0.34 - 0.54)</b> | 37             | (33.9) | <b>0.46 (0.32 - 0.67)</b>  | 24              | (7.3)  | <b>0.52 (0.34 - 0.81)</b> | 60             | (39.0) | <b>0.63 (0.44 - 0.89)</b> |
| <b>Alcohol use after awareness of pregnancy</b>      |         |        |                           |                |        |                            |                 |        |                           |                |        |                           |
| No                                                   | 2,018   | (26.1) | Reference                 | 663            | (26.5) | Reference                  | 298             | (11.4) | Reference                 | 935            | (50.4) | Reference                 |
| Yes                                                  | 566     | (38.2) | <b>1.40 (1.23 - 1.59)</b> | 213            | (31.6) | <b>1.26 (1.04 - 1.52)</b>  | 36              | (17.9) | <b>1.85 (1.25 - 2.73)</b> | 255            | (57.4) | <b>1.33 (1.07 - 1.65)</b> |
| Cannot remember                                      | 22      | (39.3) | 1.45 (0.81 - 2.61)        | 11             | (45.8) | <b>2.46 (1.07 - 5.61)</b>  | 1               | (14.3) | 0.91 (0.11 - 7.79)        | 22             | (57.9) | 1.35 (0.69 - 2.64)        |
| <b>Smoking during pregnancy</b>                      |         |        |                           |                |        |                            |                 |        |                           |                |        |                           |
| No                                                   | 2,435   | (93.4) | Reference                 | 832            | (30.5) | Reference                  | 314             | (11.5) | Reference                 | 1,103          | (40.4) | Reference                 |
| Yes                                                  | 171     | (6.6)  | <b>0.52 (0.43 - 0.63)</b> | 53             | (1.9)  | <b>0.63 (0.46 - 0.87)</b>  | 21              | (0.8)  | 0.79 (0.48 - 1.30)        | 107            | (3.9)  | <b>0.52 (0.39 - 0.68)</b> |

Note: \* a filter was applied to the Overall Odds Ratio calculation to ensure a homogeneous model resulting in 175 women removed from the calculation. There was no variable included in the model where missing data was > 0.5%.

|                                                      | North America |        |                           | South America |        |                           | Australia |         |                           |
|------------------------------------------------------|---------------|--------|---------------------------|---------------|--------|---------------------------|-----------|---------|---------------------------|
|                                                      | N             | (%)    | aOR (95% CI)              | N             | (%)    | aOR (95% CI)              | N         | (%)     | aOR (95% CI)              |
| <b>Region of residence</b>                           | 132           | (25.3) | 0.95 (0.77 - 1.19)        | 33            | (10.5) | <b>0.34 (0.24 - 0.50)</b> | 92        | 4(43.8) | <b>2.18 (1.63 - 2.92)</b> |
| <b>Maternal age (years)</b>                          |               |        |                           |               |        |                           |           |         |                           |
| <= 20                                                | 8             | (21.1) | 1.39 (0.53 - 3.63)        | 3             | (8.6)  | 0.65 (0.18 - 2.43)        | 2         | (20.0)  | 0.38 (0.06 - 2.52)        |
| 21 - 30                                              | 66            | (22.9) | Reference                 | 33            | (15.6) | Reference                 | 42        | (44.7)  | Reference                 |
| 31 - 40                                              | 64            | (32.3) | 1.31 (0.84 - 2.05)        | 23            | (25.0) | 1.66 (0.87 - 3.18)        | 46        | (44.7)  | 0.78 (0.40 - 1.51)        |
| >= 40                                                | 4             | (44.4) | 2.26 (0.54 - 9.35)        | 3             | (42.9) | 10.48 (1.52 - 72.22)      | 5         | (50.0)  | 1.10 (0.25 - 4.76)        |
| <b>Previous children</b>                             |               |        |                           |               |        |                           |           |         |                           |
| No                                                   | 66            | (28.0) | Reference                 | 14            | (13.2) | Reference                 | 45        | (43.3)  | Reference                 |
| Yes                                                  | 76            | (25.6) | 0.88 (0.57 - 1.37)        | 48            | (20.0) | 1.35 (0.67 - 2.72)        | 50        | (44.2)  | 1.04 (0.53 - 2.03)        |
| <b>Marital Status</b>                                |               |        |                           |               |        |                           |           |         |                           |
| Married/cohabitating                                 | 125           | (28.3) | Reference                 | 49            | (17.9) | Reference                 | 90        | (46.6)  | Reference                 |
| Single/divorced/other                                | 17            | (18.7) | 0.94 (0.48 - 1.84)        | 13            | (17.8) | 1.15 (0.55 - 2.40)        | 5         | (20.8)  | 0.69 (0.20 - 2.36)        |
| <b>Working status</b>                                |               |        |                           |               |        |                           |           |         |                           |
| Employed but not as HCP                              | 73            | (28.9) | Reference                 | 39            | (22.0) | Reference                 | 61        | (47.7)  | Reference                 |
| Student                                              | 19            | (32.2) | 1.55 (0.79 - 3.04)        | 11            | (18.6) | 1.04 (0.47 - 2.40)        | 3         | (33.3)  | 0.64 (0.13 - 3.13)        |
| Housewife                                            | 20            | (24.4) | 0.97 (0.52 - 1.82)        | 5             | (8.8)  | 0.47 (0.16 - 1.37)        | 18        | (43.9)  | 0.96 (0.41 - 2.27)        |
| HCP                                                  | 21            | (25.9) | 0.79 (0.44 - 1.43)        | 2             | (10.0) | 0.26 (0.05 - 1.43)        | 11        | (40.7)  | 0.60 (0.25 - 1.45)        |
| Job seeker                                           | 4             | (11.8) | 0.50 (0.16 - 1.60)        | 2             | (15.4) | 1.11 (0.21 - 5.74)        | 0         | (0.0)   | -                         |
| Other than above                                     | 5             | (20.8) | 0.79 (0.27 - 2.30)        | 3             | (15.0) | 0.70 (0.18 - 2.77)        | 2         | (28.6)  | 0.61 (0.10 - 3.73)        |
| <b>Education level</b>                               |               |        |                           |               |        |                           |           |         |                           |
| High school                                          | 20            | (15.0) | Reference                 | 25            | (18.0) | Reference                 | 19        | (30.2)  | Reference                 |
| < High school                                        | 2             | (18.2) | 1.65 (0.31 - 8.77)        | 8             | (10.7) | 0.75 (0.31 - 1.84)        | 0         | (0.0)   |                           |
| > High school                                        | 111           | (32.3) | 1.96 (1.05 - 3.68)        | 20            | (19.0) | 1.04 (0.51 - 2.14)        | 67        | (48.9)  | 1.62 (0.78 - 3.35)        |
| Other, unspecified                                   | 9             | (20.0) | 1.25 (0.48 - 3.22)        | 9             | (33.3) | 2.52 (0.94 - 6.74)        | 9         | (56.3)  | 3.32 (0.99 - 11.11)       |
| <b>Folic acid use before and/or during pregnancy</b> |               |        |                           |               |        |                           |           |         |                           |
| Yes                                                  | 138           | (28.8) | Reference                 | 61            | (19.4) | Reference                 | 92        | (45.5)  | Reference                 |
| No                                                   | 4             | (7.4)  | <b>0.28 (0.09 - 0.82)</b> | 1             | (3.2)  | 0.18 (0.02 - 1.45)        | 3         | (23.1)  | 0.61 (0.13 - 2.74)        |
| <b>Alcohol use after awareness of pregnancy</b>      |               |        |                           |               |        |                           |           |         |                           |
| No                                                   | 102           | (23.2) | Reference                 | 56            | (19.2) | Reference                 | 67        | (42.9)  | Reference                 |
| Yes                                                  | 40            | (44.4) | <b>2.25 (1.37 - 3.70)</b> | 5             | (11.4) | 0.69 (0.24 - 2.00)        | 28        | (47.5)  | 1.15 (0.59 - 2.25)        |
| Cannot remember                                      | 0             | (0.0)  | -                         | 1             | (11.1) | 0.80 (0.09 - 7.00)        | 0         | (0.0)   | -                         |
| <b>Smoking during pregnancy</b>                      |               |        |                           |               |        |                           |           |         |                           |
| No                                                   | 128           | (4.7)  | Reference                 | 58            | (2.1)  | Reference                 | 88        | (3.2)   | Reference                 |
| Yes                                                  | 14            | (0.5)  | 0.96 (0.48 - 1.91)        | 3             | (0.1)  | 0.56 (0.14 - 2.12)        | 7         | (0.3)   | 0.36 (0.12 - 1.00)        |

Note: \* a filter was applied to the Overall Odds Ratio calculation to ensure a homogeneous model resulting in 175 women removed from the calculation. There was no variable included in the model where missing data was > 0.5%.
