# Supplementary material for: Herbal medicine use in pregnancy: results of a multinational study
Source: PubMed Central journal article supplement (PMC4029224; doi:10.1186/1472-6882-13-355), 2013-12-12
Supplement: 1472-6882-13-355-S6.pdf [file 1472-6882-13-355-S6.pdf]

**Additional file 6:** Source of the recommendation to use herbal medicine in pregnancy, by region and country.

|                        | Percentage of women indicating each recommendation source |                |             |                  |             |                |                    |                   |             |            |
|------------------------|-----------------------------------------------------------|----------------|-------------|------------------|-------------|----------------|--------------------|-------------------|-------------|------------|
|                        | Total responses                                           | Own initiative | Physician   | Family & Friends | Internet    | Midwife, nurse | Pharmacy personnel | Magazine or media | Herbal shop | Other**    |
|                        | N                                                         | %*             | %*          | %*               | %*          | %*             | %*                 | %*                | %*          | %*         |
| <b>Total</b>           | <b>3,961</b>                                              | <b>28.6</b>    | <b>21.6</b> | <b>16.8</b>      | <b>11.3</b> | <b>7.8</b>     | <b>6.1</b>         | <b>3.3</b>        | <b>3.0</b>  | <b>1.5</b> |
| <b>Western Europe</b>  | 1,315                                                     | 27.6           | 14.7        | 18.6             | 11.3        | 10.2           | 7.7                | 4.0               | 4.0         | 2.1        |
| Austria                | 62                                                        | 32.3           | 21.0        | 11.3             | 9.7         | *              | 16.1               | *                 | -           | *          |
| France                 | 74                                                        | 29.7           | 21.6        | 14.9             | 9.5         | 13.5           | 8.1                | 2.7               | -           | -          |
| Italy                  | 305                                                       | 23.9           | 27.9        | 12.5             | 9.5         | 4.6            | 7.9                | 4.3               | 9.5         | -          |
| Switzerland            | 405                                                       | 30.9           | 17.0        | 13.1             | 7.4         | 10.1           | 13.8               | 1.7               | 3.0         | 3.0        |
| The Netherlands        | 9                                                         | 22.2           | 33.3        | -                | *           | -              | *                  | *                 | -           | -          |
| United Kingdom         | 460                                                       | 26.3           | 1.5         | 29.3             | 16.1        | 14.6           | 0.9                | 5.9               | 2.4         | 3.0        |
| <b>Northern Europe</b> | 548                                                       | 31.9           | 8.6         | 19.2             | 15.7        | 9.1            | 5.3                | 3.6               | 5.7         | 0.9        |
| Finland                | 79                                                        | 39.2           | 7.6         | 11.4             | 13.9        | 13.9           | *                  | *                 | 6.3         | *          |
| Iceland                | 34                                                        | 44.1           | *           | 17.6             | 14.7        | 14.7           | *                  | -                 | *           | -          |
| Norway                 | 387                                                       | 27.9           | 10.1        | 20.9             | 17.1        | 7.8            | 6.5                | 4.1               | 5.4         | *          |
| Sweden                 | 48                                                        | 43.8           | *           | 18.8             | 8.3         | 8.3            | *                  | *                 | 8.3         | *          |
| <b>Eastern Europe</b>  | 657                                                       | 28.0           | 34.5        | 13.3             | 10.3        | 4.9            | 5.6                | 2.6               | 0.8         | *          |
| Croatia                | 116                                                       | 34.5           | 17.2        | 12.9             | 10.3        | *              | 15.5               | 5.2               | *           | *          |
| Poland                 | 422                                                       | 19.4           | 34.8        | 16.1             | 9.7         | 5.2            | 10.4               | 2.8               | *           | -          |
| Russia                 | 971                                                       | 30.2           | 38.1        | 13.1             | 8.8         | 5.8            | 1.9                | 2.2               | -           | -          |
| Serbia                 | 71                                                        | 26.8           | 36.6        | 8.5              | 12.7        | -              | 14.1               | -                 | *           | -          |
| Slovenia               | 77                                                        | 39.0           | 10.4        | 5.2              | 29.9        | *              | *                  | 5.2               | 5.2         | -          |
| <b>North America</b>   | 209                                                       | 31.6           | 8.6         | 18.2             | 11.5        | 13.9           | 2.4                | 3.3               | 3.8         | *          |
| Canada                 | 84                                                        | 28.6           | 11.9        | 19.0             | 8.3         | 10.7           | 6.0                | *                 | 4.8         | *          |
| USA                    | 125                                                       | 33.6           | 6.4         | 17.6             | 13.6        | 16.0           | -                  | 3.2               | 3.2         | *          |
| <b>South America</b>   | 71                                                        | 22.5           | 12.7        | 36.6             | 8.5         | *              | *                  | 5.6               | 9.9         | -          |
| <b>Australia</b>       | 161                                                       | 29.8           | 9.9         | 21.1             | 9.3         | 9.3            | 8.1                | *                 | 5.6         | *          |

Note: Women were permitted to indicate more than one source for the recommendation to take an herbal medicine. \*\* Includes sources such as prenatal, yoga class or CAM Practitioner.

\* Standard errors were calculated for all percentage; however, where the SE > 50% the point estimate is not reported and an “\*” is used.
