# Supplementary material for: Herbal medicine use in pregnancy: results of a multinational study
Source: BMC Complement Altern Med. 2013 Dec 12;13:355. doi: 10.1186/1472-6882-13-355 (PMC4029224; doi:10.1186/1472-6882-13-355)
Supplement: Additional file 1 — Websites used for recruitment and internet penetration rates in each participating country. A table which summarizes the websites where the questionnaire was available in each country and the associated internet penetration rates. [file 1472-6882-13-355-S1.pdf]

**Additional file 1:** Websites used for recruitment and internet penetration rates in each participating country

| <i>Country</i>               | <i>Website used for recruitment</i>                                                                                                                                                                                                     | <i>Internet penetration rates</i> * |
|------------------------------|-----------------------------------------------------------------------------------------------------------------------------------------------------------------------------------------------------------------------------------------|-------------------------------------|
| <b><i>Western Europe</i></b> |                                                                                                                                                                                                                                         |                                     |
| United Kingdom               | <p><i>Targeted email to pregnancy forum subscribers:</i></p> <p>www.bounty.com</p> <p><i>Pregnancy Forums:</i> www.pregnancyforum.co.uk;<br/>www.pregnancyforum.org.uk</p>                                                              | 93% [1]                             |
| Italy                        | <p><i>Pregnancy Forums:</i> www.gravidanzaonline.it;<br/>www.forumsalute.it; www.mammole.it;<br/>www.pianetamamma.it; www.miobambino.it</p> <p><i>Targeted email to pregnancy forum subscribers:</i></p> <p>www.gravidanzaonline.it</p> | 70% [1]                             |
| Switzerland                  | www.bebe-bebe.com; www.swissmom.ch                                                                                                                                                                                                      | 84.2% [2]                           |
| France                       | www.aufeminin.com ( <i>Including ipad application to website subscribers</i> )                                                                                                                                                          | 91% [1]                             |
| The Netherlands              | www.lareb.nl; www.gezondzwangerzijn.nl;<br>www.babybytes.nl                                                                                                                                                                             | 98% [1]                             |
| Austria                      | www.schwangerschaft.at; www.schwangerschafts-blog.at; www.fratz.at; www.netdoctor.at;<br>www.babycenter.at; www.baby-boom.at; www.ekiz-                                                                                                 | 93% [1]                             |

| <i>Country</i>         | <i>Website used for recruitment</i>                                                                                                                                                                                    | <i>Internet penetration rates</i> * |
|------------------------|------------------------------------------------------------------------------------------------------------------------------------------------------------------------------------------------------------------------|-------------------------------------|
|                        | dachverband.at; www.babyguide.at                                                                                                                                                                                       |                                     |
| <i>Northern Europe</i> |                                                                                                                                                                                                                        |                                     |
| Norway                 | www.barnimagen.com; www.klikk.no;<br>www.jormorsiri.no; www.tryggmamamedisin.no                                                                                                                                        | 99% [1]                             |
| Sweden                 | www.barntotal.se; www.minbebis.com;<br>www.se.babycenter.com; www.socmed.gu.se                                                                                                                                         | 99% [1]                             |
| Finland                | www.vauva.fi; www.meidanperhe.fi; www.kaksplus.fi                                                                                                                                                                      | 99% [1]                             |
| Iceland                | <i>Pregnancy Forums:</i> www.bland.is                                                                                                                                                                                  | 100% [1]                            |
| <i>Eastern Europe</i>  |                                                                                                                                                                                                                        |                                     |
| Russia                 | www.babyblog.ru; www.littleone.ru<br><br><i>Pregnancy Forums:</i> www.woman.ru; www.9months.ru;<br>www.bemam; www.280dney.ru; www.iampregnant.ru<br>www.pregnancy.org.ua; www.baby.ru;<br>www.mama66.ru; www.spuzom.ru | 47.7% [2]                           |
| Poland                 | www.zzief.umlub.pl<br><br><i>Pregnancy Forums:</i> www.ebrzuszek.pl;<br>www.babyboom.pl; www.zapytajpolozna.pl;<br>www.planujemydziecko.pl; www.twoja-ciaza.com.pl                                                     | 84% [1]                             |
| Croatia                | www.cybermed.hr                                                                                                                                                                                                        | 80% [1] (data                       |

| <i>Country</i> | <i>Website used for recruitment</i>       | <i>Internet penetration rates</i> * |
|----------------|-------------------------------------------|-------------------------------------|
|                |                                           | from 2010)                          |
| Serbia         | www.ringeraja.rs                          | 52% [1](data from 2009)             |
| Slovenia       | <i>Pregnancy Forums:</i> www.med.over.net | 92% [1]                             |

\* Indicates the frequency of internet access - at least once a week, including every day - among individuals aged 25-34 years. Differences between men and women were relatively small. Slightly more than two thirds of men (70%) and 65% of women used the Internet regularly.

| <i>Country</i>              | <i>Website used for recruitment</i>                                                                                                                                                                                                           | <i>Internet penetration rates</i>      |
|-----------------------------|-----------------------------------------------------------------------------------------------------------------------------------------------------------------------------------------------------------------------------------------------|----------------------------------------|
| <b><i>North America</i></b> |                                                                                                                                                                                                                                               |                                        |
| USA/Canada                  | www.otispregnancy.org; Facebook page of OTIS;<br>www.babyontheway.com.ca;<br>www.justmommies.com<br><br><i>Pregnancy Forums:</i> www.babyandbump.com<br>www.babycentre.com.ca; www.thecradle.com;<br>www.talk.sheknows.com; www.parenting.com | Canada: 94% [3] **<br>USA: 80.2% [4] § |
| <b><i>South America</i></b> | www.otispregnancy.org; Facebook page of OTIS<br><br><i>Pregnancy Forums:</i> www.semanaasemana.com;                                                                                                                                           | South America: 48.2% [2]               |

|  |                                       |  |
|--|---------------------------------------|--|
|  | www.univision.com; www.elembarazo.net |  |
|--|---------------------------------------|--|

<sup>\*\*</sup> Indicates individuals aged 16-45 years who used the internet for personal use.

<sup>§</sup> Indicates individuals > 18 years old, access from anywhere; household internet for women is equal to 68.1%; higher percentages are observed for people aged 25-54 years.

| <i>Country</i>   | <i>Website used for recruitment</i>                                                                               | <i>Internet penetration rates<sup>§§</sup></i> |
|------------------|-------------------------------------------------------------------------------------------------------------------|------------------------------------------------|
| <i>Australia</i> | www.mothersafe.org.au; www.bubhub.com.au<br><br><i>Pregnancy Forums:</i> www.abds.org.au;<br><br>www.birth.com.au | 83% [5]                                        |

<sup>§§</sup> Indicates households with access to the internet at home.

## References

1. Seybert H: **Internet use in households and by individuals in 2011.**, vol. 66: Eurostat. Statistics in focus. 2011.
2. **Internet World Stats. Usage and population statistics**  
[<http://www.internetworldstats.com/>]. Last accessed: November 13, 2012.
3. **Individual Internet use and E-commerce (2010)** [<http://www.statcan.gc.ca/daily-quotidien/111012/dq111012a-eng.htm>]. Last accessed: November 13, 2012.
4. **United States Census Bureau. The 2012 Statistical Abstract. Information & Communications: Internet Publishing and Broadcasting and Internet Usage.**  
[[http://www.census.gov/compendia/statab/cats/information\\_communications/internet\\_pu](http://www.census.gov/compendia/statab/cats/information_communications/internet_pu)

blishing\_and\_broadcasting\_and\_internet\_usage.html.]. Last accessed: November 13, 2012.

5. **Australian Bureau of Statistics. Household Use of Information Technology, Australia, 2010-11.** [  
<http://www.abs.gov.au/ausstats/abs@.nsf/Latestproducts/8146.0Main%20Features12010-11?opendocument&tabname=Summary&prodno=8146.0&issue=2010-11&num=&view=>]. Last accessed: November 13, 2012.
